# Supplementary material for: Life cycle assessment of lead recycling processes in perovskite solar cells
Source: Royal Society of Chemistry journal article supplement (doi:10.1039/d4cc05121a), 2024-12-26
Supplement: d4cc05121a1.pdf [file d4cc05121a1.pdf]

## Supporting Information

### **Life Cycle Assessment of Lead Recycling Processes in Perovskite Solar Cells**

Jae Myeong Lee,<sup>†a</sup> Hee Jung Kim<sup>†a</sup> and Hyun Suk Jung <sup>\*a,b</sup>

a. School of Advanced Materials Science and Engineering, Sungkyunkwan University, 2066, Seobu-ro, Jangan-gu, Suwon-si, Gyeonggi-do 16419, Republic of Korea

b. SKKU Institute of Energy Science and Technology (SIEST), Sungkyunkwan University, Suwon, 2066, Seobu-ro, Jangan-gu, Suwon-si, Gyeonggi-do 16419, Republic of Korea

<sup>†</sup> J.M.L. and H.J.K. contributed equally to this work.

Table S1. Life cycle inventory of R1 method. <sup>1</sup>

| Process                           | unit           | Amount     |
|-----------------------------------|----------------|------------|
| Materials                         |                |            |
| DMF                               | kg             | 1.120.E+02 |
| PTFE                              | kg             | 5.545.E-03 |
| 2 M NH <sub>4</sub> OH            | kg             | 1.080.E+01 |
| D.I water                         | kg             | 5.916.E+02 |
| 0.038 M HI                        | kg             | 1.193.E+02 |
| Energy                            |                |            |
| Centrifugation                    | kWh            | 2.327.E+02 |
| Filtration                        | kWh            | 7.933.E-03 |
| Stirring                          | kWh            | 4.351.E-03 |
| Washing                           | kWh            | 3.747.E+02 |
| Drying                            | kWh            | 4.019.E-01 |
| Waste                             |                |            |
| Spent Solvent Mixture             | kg             | 2.421.E+02 |
| Wastewater                        | m <sup>3</sup> | 4.733.E-01 |
| Hazardous waste, for incineration | kg             | 5.545.E-03 |

Table S2. Life cycle inventory of R2 method. <sup>2</sup>

| Process                           | unit           | Amount     |
|-----------------------------------|----------------|------------|
| Materials                         |                |            |
| EA                                | kg             | 6.543.E+02 |
| D.I water                         | kg             | 1.446.E+03 |
| DMF                               | kg             | 6.848.E+02 |
| Filter                            | kg             | 1.542.E-01 |
| Energy                            |                |            |
| Filtration                        | kWh            | 4.836.E-02 |
| Heating                           | kWh            | 2.438.E+01 |
| Cooling                           | kWh            | 3.143.E+00 |
| Drying                            | kWh            | 1.082.E+02 |
| Spent Solvent Mixture             | kg             | 1.339.E+03 |
| Wastewater                        | m <sup>3</sup> | 1.446.E+00 |
| Hazardous waste, for incineration | kg             | 1.542.E-01 |

Table S3. Life cycle inventory of R3 method. <sup>3</sup>

| Process                           | unit | Amount     |
|-----------------------------------|------|------------|
| Materials                         |      |            |
| D.I water                         | kg   | 9.495.E+02 |
| Filter                            | kg   | 6.105.E-01 |
| Energy                            |      |            |
| Heating                           | kWh  | 4.167.E+01 |
| Filtration                        | kWh  | 1.905.E-01 |
| Cooling                           | kWh  | 8.254.E+00 |
| Drying                            | kWh  | 5.581.E-01 |
| Waste                             |      |            |
| Wastewater                        | m3   | 9.495.E-01 |
| Hazardous waste, for incineration | kg   | 6.105.E-01 |

Table S4. Life cycle inventory of R4 method. <sup>4</sup>

| Process                 | unit           | Amount     |
|-------------------------|----------------|------------|
| Materials               |                |            |
| DMF                     | kg             | 5.155.E+01 |
| Cationic Resin          | kg             | 3.011.E+00 |
| 0.16 M HNO <sub>3</sub> | kg             | 5.500.E+01 |
| NaI                     | kg             | 3.255.E-01 |
| D.I water               | kg             | 5.445.E+01 |
| IPA                     | kg             | 4.287.E+01 |
| Energy                  |                |            |
| Washing                 | kWh            | 6.898.E+01 |
| Drying                  | kWh            | 5.581.E-01 |
| Waste                   |                |            |
| Spent Solvent Mixture   | kg             | 1.494.E+02 |
| Wastewater              | m <sup>3</sup> | 5.445.E-02 |

Table S5. Life cycle inventory of R5 method. <sup>5</sup>

| Process          | unit | Amount     |
|------------------|------|------------|
| Materials        |      |            |
| D.I water        | kg   | 1.617.E+03 |
| WH               | kg   | 1.920.E-01 |
| HNO <sub>3</sub> | kg   | 9.001.E+01 |
| KI               | kg   | 3.601.E-01 |
| Energy           |      |            |
| Sonication       | kWh  | 8.571.E-01 |
| Stirring         | kWh  | 3.810.E-02 |
| Filtration       | kWh  | 9.524.E-02 |
| Washing          | kWh  | 1.218.E+02 |
| Drying           | kWh  | 7.974.E-02 |
| Waste            |      |            |
| Wastewater       | m3   | 1.617.E+00 |

Table S6. Life cycle impact assessment results for 1kg of R1 method

| Impact category | Unit                     | Total      | DMF        | PTFE       | 2 M NH <sub>4</sub> OH | D.I Water  | 0.038 M HI | Centrifugation | Filtration | Mixer      | Washing    | Drying     | Spent solvent mixture | Wastewater  | Hazardous waste |
|-----------------|--------------------------|------------|------------|------------|------------------------|------------|------------|----------------|------------|------------|------------|------------|-----------------------|-------------|-----------------|
| GWP             | kg CO <sub>2</sub> eq    | 1.151.E+03 | 4.140.E+02 | 7.598.E-01 | 8.829.E+00             | 2.865.E-01 | 4.774.E+00 | 1.640.E+02     | 5.590.E-03 | 3.066.E-03 | 2.641.E+02 | 2.832.E-01 | 2.942.E+02            | 1.347.E-01  | 1.404.E-02      |
| ODP             | kg CFC <sup>-11</sup> eq | 3.137.E-04 | 9.282.E-05 | 2.153.E-05 | 9.434.E-07             | 2.594.E-07 | 1.403.E-06 | 4.715.E-05     | 1.607.E-09 | 8.816.E-10 | 7.593.E-05 | 8.142.E-08 | 7.319.E-05            | 3.885.E-07  | 3.729.E-09      |
| IRP             | kBq Co-60 eq             | 1.439.E+02 | 2.827.E+01 | 3.940.E-03 | 4.671.E-02             | 1.898.E-02 | 2.160.E-01 | 4.373.E+01     | 1.491.E-03 | 8.176.E-04 | 7.042.E+01 | 7.552.E-02 | 1.153.E+00            | 4.984.E-03  | 1.859.E-04      |
| HOFPP           | kg NO <sub>x</sub> eq    | 2.057.E+00 | 8.672.E-01 | 1.062.E-04 | 1.161.E-02             | 6.757.E-04 | 8.055.E-03 | 3.972.E-01     | 1.354.E-05 | 7.427.E-06 | 6.397.E-01 | 6.859.E-04 | 1.314.E-01            | 3.217.E-04  | 1.208.E-05      |
| PMFP            | kg PM2.5 eq              | 1.133.E+00 | 5.131.E-01 | 1.066.E-04 | 6.001.E-03             | 7.414.E-04 | 5.277.E-03 | 2.135.E-01     | 7.278.E-06 | 3.992.E-06 | 3.438.E-01 | 3.687.E-04 | 4.992.E-02            | 2.011.E-04  | 6.063.E-06      |
| EOFP            | kg NO <sub>x</sub> eq    | 2.162.E+00 | 9.442.E-01 | 1.125.E-04 | 1.225.E-02             | 6.973.E-04 | 8.481.E-03 | 4.059.E-01     | 1.384.E-05 | 7.590.E-06 | 6.537.E-01 | 7.010.E-04 | 1.355.E-01            | 3.318.E-04  | 1.270.E-05      |
| TAP             | kg SO <sub>2</sub> eq    | 2.241.E+00 | 1.141.E+00 | 2.690.E-04 | 1.589.E-02             | 1.853.E-03 | 1.232.E-02 | 3.675.E-01     | 1.253.E-05 | 6.872.E-06 | 5.919.E-01 | 6.347.E-04 | 1.097.E-01            | 3.923.E-04  | 1.341.E-05      |
| FEP             | kg P eq                  | 5.111.E-01 | 1.389.E-01 | 1.837.E-05 | 2.040.E-03             | 1.286.E-04 | 1.084.E-03 | 1.178.E-01     | 4.017.E-06 | 2.203.E-06 | 1.897.E-01 | 2.035.E-04 | 5.821.E-02            | 2.995.E-03  | 4.389.E-06      |
| MEP             | kg N eq                  | 3.739.E-01 | 3.455.E-01 | 1.246.E-06 | 1.319.E-04             | 9.982.E-06 | 3.536.E-04 | 7.995.E-03     | 2.725.E-07 | 1.495.E-07 | 1.287.E-02 | 1.381.E-05 | 5.865.E-03            | 1.068.E-03  | 2.743.E-07      |
| TETP            | kg 1,4-DCB               | 2.764.E+03 | 1.320.E+03 | 5.150.E-01 | 1.395.E+01             | 4.244.E+00 | 4.599.E+01 | 4.955.E+02     | 1.689.E-02 | 9.264.E-03 | 7.979.E+02 | 8.556.E-01 | 8.405.E+01            | 5.708.E-01  | 1.585.E-02      |
| FETP            | kg 1,4-DCB               | 4.542.E+01 | 1.454.E+01 | 5.262.E-03 | 1.689.E-01             | 4.174.E-02 | 4.165.E-01 | 1.124.E+01     | 3.833.E-04 | 2.102.E-04 | 1.811.E+01 | 1.942.E-02 | 8.608.E-01            | 1.843.E-02  | 2.407.E-04      |
| METP            | kg 1,4-DCB               | 5.819.E+01 | 1.874.E+01 | 6.899.E-03 | 2.262.E-01             | 5.461.E-02 | 2.093.E-01 | 1.446.E+01     | 4.928.E-04 | 2.703.E-04 | 2.328.E+01 | 2.497.E-02 | 1.166.E+00            | 2.507.E-02  | 3.289.E-04      |
| HTPc            | kg 1,4-DCB               | 4.726.E+01 | 2.033.E+01 | 7.747.E-03 | 2.659.E-01             | 3.199.E-02 | 1.655.E-01 | 9.324.E+00     | 3.178.E-04 | 1.743.E-04 | 1.502.E+01 | 1.610.E-02 | 2.074.E+00            | 2.323.E-02  | 1.528.E-03      |
| HTPnc           | kg 1,4-DCB               | 8.940.E+02 | 2.986.E+02 | 1.544.E-01 | 4.233.E+00             | 8.266.E-01 | 3.367.E+00 | 2.160.E+02     | 7.363.E-03 | 4.038.E-03 | 3.478.E+02 | 3.730.E-01 | 2.156.E+01            | 1.038.E+00  | 5.738.E-03      |
| LOP             | m2a crop eq              | 1.632.E+01 | 7.797.E+00 | 1.119.E-03 | 1.411.E-01             | 7.118.E-03 | 5.898.E-02 | 2.977.E+00     | 1.015.E-04 | 5.566.E-05 | 4.794.E+00 | 5.141.E-03 | 5.342.E-01            | 2.712.E-03  | 7.939.E-05      |
| SOP             | kg Cu eq                 | 6.703.E+00 | 1.190.E+00 | 3.732.E-04 | 1.626.E-02             | 3.437.E-03 | 4.518.E+00 | 3.352.E-01     | 1.143.E-05 | 6.267.E-06 | 5.398.E-01 | 5.788.E-04 | 9.815.E-02            | 1.035.E-03  | 1.109.E-05      |
| FFP             | kg oil eq                | 3.150.E+02 | 1.885.E+02 | 1.451.E-02 | 2.302.E+00             | 6.756.E-02 | 1.291.E+00 | 4.322.E+01     | 1.473.E-03 | 8.081.E-04 | 6.960.E+01 | 7.464.E-02 | 9.821.E+00            | 2.730.E-02  | 1.492.E-03      |
| WCP             | m <sup>3</sup>           | 8.305.E+00 | 5.743.E+00 | 7.074.E-04 | 1.630.E-01             | 5.709.E-01 | 1.446.E-01 | 8.441.E-01     | 2.877.E-05 | 1.578.E-05 | 1.359.E+00 | 1.458.E-03 | 3.734.E-01            | -8.954.E-01 | 4.580.E-05      |

Table S7. Life cycle impact assessment results for 1kg of R2 method

| Impact category | Unit                     | Total      | EA         | D.I water  | DMF        | Filter     | Filtration | Heating    | Cooling    | Drying     | Spent solvent mixture | Wastewater  | Hazardous waste |
|-----------------|--------------------------|------------|------------|------------|------------|------------|------------|------------|------------|------------|-----------------------|-------------|-----------------|
| GWP             | kg CO <sub>2</sub> eq    | 6.440.E+03 | 2.184.E+03 | 7.005.E-01 | 2.531.E+03 | 5.346.E-02 | 3.408.E-02 | 1.718.E+01 | 2.215.E+00 | 7.612.E+01 | 1.627.E+03            | 4.130.E-01  | 3.905.E-01      |
| ODP             | kg CFC <sup>-11</sup> eq | 1.525.E-03 | 5.229.E-04 | 6.341.E-07 | 5.675.E-04 | 1.837.E-08 | 9.798.E-09 | 4.939.E-06 | 6.368.E-07 | 2.189.E-05 | 4.048.E-04            | 1.191.E-06  | 1.037.E-07      |
| IRP             | kBq Co-60 eq             | 2.962.E+02 | 9.142.E+01 | 4.640.E-02 | 1.728.E+02 | 2.614.E-03 | 9.087.E-03 | 4.581.E+00 | 5.906.E-01 | 2.030.E+01 | 6.377.E+00            | 1.528.E-02  | 5.169.E-03      |
| HOFp            | kg NO <sub>x</sub> eq    | 1.186.E+01 | 5.600.E+00 | 1.652.E-03 | 5.302.E+00 | 2.091.E-04 | 8.255.E-05 | 4.161.E-02 | 5.365.E-03 | 1.844.E-01 | 7.267.E-01            | 9.860.E-04  | 3.358.E-04      |
| PMFP            | kg PM2.5 eq              | 6.622.E+00 | 3.081.E+00 | 1.813.E-03 | 3.137.E+00 | 1.147.E-04 | 4.437.E-05 | 2.236.E-02 | 2.884.E-03 | 9.911.E-02 | 2.761.E-01            | 6.163.E-04  | 1.686.E-04      |
| EOFp            | kg NO <sub>x</sub> eq    | 1.291.E+01 | 6.148.E+00 | 1.705.E-03 | 5.773.E+00 | 2.159.E-04 | 8.436.E-05 | 4.252.E-02 | 5.483.E-03 | 1.884.E-01 | 7.495.E-01            | 1.017.E-03  | 3.532.E-04      |
| TAP             | kg SO <sub>2</sub> eq    | 1.512.E+01 | 7.322.E+00 | 4.531.E-03 | 6.975.E+00 | 2.538.E-04 | 7.638.E-05 | 3.850.E-02 | 4.964.E-03 | 1.706.E-01 | 6.068.E-01            | 1.202.E-03  | 3.730.E-04      |
| FEP             | kg P eq                  | 2.171.E+00 | 9.213.E-01 | 3.144.E-04 | 8.492.E-01 | 2.702.E-05 | 2.449.E-05 | 1.234.E-02 | 1.591.E-03 | 5.469.E-02 | 3.220.E-01            | 9.179.E-03  | 1.220.E-04      |
| MEP             | kg N eq                  | 2.210.E+00 | 5.717.E-02 | 2.441.E-05 | 2.113.E+00 | 4.648.E-06 | 1.661.E-06 | 8.374.E-04 | 1.080.E-04 | 3.711.E-03 | 3.244.E-02            | 3.273.E-03  | 7.628.E-06      |
| TETP            | kg 1,4-DCB               | 1.608.E+04 | 7.238.E+03 | 1.038.E+01 | 8.071.E+03 | 4.099.E-01 | 1.030.E-01 | 5.190.E+01 | 6.692.E+00 | 2.300.E+02 | 4.648.E+02            | 1.749.E+00  | 4.406.E-01      |
| FETP            | kg 1,4-DCB               | 1.822.E+02 | 8.189.E+01 | 1.020.E-01 | 8.887.E+01 | 3.845.E-03 | 2.337.E-03 | 1.178.E+00 | 1.519.E-01 | 5.220.E+00 | 4.761.E+00            | 5.648.E-02  | 6.693.E-03      |
| METP            | kg 1,4-DCB               | 2.373.E+02 | 1.077.E+02 | 1.335.E-01 | 1.146.E+02 | 5.185.E-03 | 3.004.E-03 | 1.514.E+00 | 1.953.E-01 | 6.711.E+00 | 6.448.E+00            | 7.684.E-02  | 9.146.E-03      |
| HTPc            | kg 1,4-DCB               | 2.545.E+02 | 1.131.E+02 | 7.822.E-02 | 1.243.E+02 | 9.970.E-03 | 1.938.E-03 | 9.767.E-01 | 1.259.E-01 | 4.328.E+00 | 1.147.E+01            | 7.120.E-02  | 4.249.E-02      |
| HTPnc           | kg 1,4-DCB               | 3.871.E+03 | 1.794.E+03 | 2.021.E+00 | 1.826.E+03 | 8.970.E-02 | 4.489.E-02 | 2.263.E+01 | 2.917.E+00 | 1.003.E+02 | 1.192.E+02            | 3.182.E+00  | 1.596.E-01      |
| LOP             | m <sup>2</sup> a crop eq | 1.028.E+02 | 5.042.E+01 | 1.740.E-02 | 4.767.E+01 | 1.374.E-03 | 6.186.E-04 | 3.118.E-01 | 4.021.E-02 | 1.382.E+00 | 2.954.E+00            | 8.313.E-03  | 2.208.E-03      |
| SOP             | kg Cu eq                 | 1.452.E+01 | 6.497.E+00 | 8.403.E-03 | 7.277.E+00 | 9.377.E-04 | 6.966.E-05 | 3.511.E-02 | 4.527.E-03 | 1.556.E-01 | 5.428.E-01            | 3.172.E-03  | 3.083.E-04      |
| FFP             | kg oil eq                | 2.281.E+03 | 1.048.E+03 | 1.652.E-01 | 1.153.E+03 | 1.285.E-02 | 8.982.E-03 | 4.527.E+00 | 5.837.E-01 | 2.006.E+01 | 5.432.E+01            | 8.367.E-02  | 4.149.E-02      |
| WCP             | m <sup>3</sup>           | 6.706.E+01 | 3.074.E+01 | 1.396.E+00 | 3.511.E+01 | 3.093.E-04 | 1.754.E-04 | 8.842.E-02 | 1.140.E-02 | 3.918.E-01 | 2.065.E+00            | -2.744.E+00 | 1.274.E-03      |



Table S8. Life cycle impact assessment results for 1kg of R3 method

| Impact category | Unit                     | Total       | D.I water  | Filter     | Heating    | Filtration | Cooling    | Drying     | Wastewater  | Hazardous waste |
|-----------------|--------------------------|-------------|------------|------------|------------|------------|------------|------------|-------------|-----------------|
| GWP             | kg CO <sub>2</sub> eq    | 3.820.E+01  | 4.599.E-01 | 2.117.E-01 | 2.937.E+01 | 1.342.E-01 | 5.816.E+00 | 3.933.E-01 | 2.712.E-01  | 1.546.E+00      |
| ODP             | kg CFC <sup>-11</sup> eq | 1.195.E-05  | 4.163.E-07 | 7.274.E-08 | 8.445.E-06 | 3.859.E-08 | 1.672.E-06 | 1.131.E-07 | 7.818.E-07  | 4.106.E-07      |
| IRP             | kBq Co-60 eq             | 9.595.E+00  | 3.046.E-02 | 1.035.E-02 | 7.832.E+00 | 3.579.E-02 | 1.551.E+00 | 1.049.E-01 | 1.003.E-02  | 2.046.E-02      |
| HOFP            | kg NO <sub>x</sub> eq    | 9.040.E-02  | 1.084.E-03 | 8.277.E-04 | 7.114.E-02 | 3.251.E-04 | 1.409.E-02 | 9.527.E-04 | 6.474.E-04  | 1.330.E-03      |
| PMFP            | kg PM2.5 eq              | 4.921.E-02  | 1.190.E-03 | 4.540.E-04 | 3.824.E-02 | 1.747.E-04 | 7.573.E-03 | 5.121.E-04 | 4.047.E-04  | 6.675.E-04      |
| EOFP            | kg NO <sub>x</sub> eq    | 9.245.E-02  | 1.119.E-03 | 8.550.E-04 | 7.271.E-02 | 3.323.E-04 | 1.440.E-02 | 9.736.E-04 | 6.677.E-04  | 1.398.E-03      |
| TAP             | kg SO <sub>2</sub> eq    | 8.629.E-02  | 2.975.E-03 | 1.005.E-03 | 6.583.E-02 | 3.008.E-04 | 1.304.E-02 | 8.815.E-04 | 7.896.E-04  | 1.477.E-03      |
| FEP             | kg P eq                  | 3.249.E-02  | 2.064.E-04 | 1.070.E-04 | 2.110.E-02 | 9.644.E-05 | 4.179.E-03 | 2.826.E-04 | 6.027.E-03  | 4.832.E-04      |
| MEP             | kg N eq                  | 3.955.E-03  | 1.602.E-05 | 1.840.E-05 | 1.432.E-03 | 6.544.E-06 | 2.836.E-04 | 1.917.E-05 | 2.149.E-03  | 3.020.E-05      |
| TETP            | kg 1,4-DCB               | 1.192.E+02  | 6.811.E+00 | 1.623.E+00 | 8.874.E+01 | 4.055.E-01 | 1.757.E+01 | 1.188.E+00 | 1.149.E+00  | 1.745.E+00      |
| FETP            | kg 1,4-DCB               | 2.595.E+00  | 6.698.E-02 | 1.522.E-02 | 2.014.E+00 | 9.204.E-03 | 3.988.E-01 | 2.697.E-02 | 3.709.E-02  | 2.650.E-02      |
| METP            | kg 1,4-DCB               | 3.344.E+00  | 8.764.E-02 | 2.053.E-02 | 2.589.E+00 | 1.183.E-02 | 5.128.E-01 | 3.468.E-02 | 5.045.E-02  | 3.621.E-02      |
| HTPc            | kg 1,4-DCB               | 2.336.E+00  | 5.135.E-02 | 3.947.E-02 | 1.670.E+00 | 7.632.E-03 | 3.307.E-01 | 2.236.E-02 | 4.675.E-02  | 1.682.E-01      |
| HTPnc           | kg 1,4-DCB               | 5.144.E+01  | 1.327.E+00 | 3.551.E-01 | 3.869.E+01 | 1.768.E-01 | 7.661.E+00 | 5.180.E-01 | 2.090.E+00  | 6.317.E-01      |
| LOP             | m2a crop eq              | 6.794.E-01  | 1.142.E-02 | 5.441.E-03 | 5.332.E-01 | 2.436.E-03 | 1.056.E-01 | 7.140.E-03 | 5.459.E-03  | 8.741.E-03      |
| SOP             | kg Cu eq                 | 8.553.E-02  | 5.516.E-03 | 3.713.E-03 | 6.003.E-02 | 2.743.E-04 | 1.189.E-02 | 8.039.E-04 | 2.083.E-03  | 1.221.E-03      |
| FFP             | kg oil eq                | 9.792.E+00  | 1.084.E-01 | 5.087.E-02 | 7.741.E+00 | 3.537.E-02 | 1.533.E+00 | 1.037.E-01 | 5.494.E-02  | 1.643.E-01      |
| WCP             | m <sup>3</sup>           | -6.956.E-01 | 9.162.E-01 | 1.225.E-03 | 1.512.E-01 | 6.909.E-04 | 2.994.E-02 | 2.024.E-03 | -1.802.E+00 | 5.043.E-03      |

Table S9. Life cycle impact assessment results for 1kg of R4 method

| Impact category | Unit                     | Total      | DMF        | Cationic Resin | 0.16 M Nitric acid | Nal        | D.I water  | IPA        | Washing    | Drying     | Spent solvent mixture | Wastewater  |
|-----------------|--------------------------|------------|------------|----------------|--------------------|------------|------------|------------|------------|------------|-----------------------|-------------|
| GWP             | kg CO <sub>2</sub> eq    | 5.346.E+02 | 1.906.E+02 | 5.597.E+00     | 1.192.E+00         | 1.801.E+00 | 2.637.E-02 | 1.042.E+02 | 4.931.E+01 | 3.933.E-01 | 1.816.E+02            | 1.555.E-02  |
| ODP             | kg CFC <sup>-11</sup> eq | 1.396.E-04 | 4.272.E-05 | 6.687.E-07     | 2.370.E-05         | 4.882.E-07 | 2.387.E-08 | 1.246.E-05 | 1.418.E-05 | 1.131.E-07 | 4.517.E-05            | 4.483.E-08  |
| IRP             | kBq Co-60 eq             | 2.850.E+01 | 1.301.E+01 | 1.446.E-01     | 7.991.E-03         | 5.599.E-02 | 1.747.E-03 | 1.314.E+00 | 1.315.E+01 | 1.049.E-01 | 7.115.E-01            | 5.752.E-04  |
| HOFP            | kg NO <sub>x</sub> eq    | 8.407.E-01 | 3.991.E-01 | 1.170.E-02     | 1.073.E-03         | 2.880.E-03 | 6.219.E-05 | 2.243.E-01 | 1.194.E-01 | 9.527.E-04 | 8.109.E-02            | 3.713.E-05  |
| PMFP            | kg PM2.5 eq              | 4.620.E-01 | 2.362.E-01 | 8.175.E-03     | 8.526.E-04         | 1.825.E-03 | 6.824.E-05 | 1.194.E-01 | 6.420.E-02 | 5.121.E-04 | 3.080.E-02            | 2.321.E-05  |
| EOFP            | kg NO <sub>x</sub> eq    | 9.101.E-01 | 4.346.E-01 | 1.223.E-02     | 1.115.E-03         | 3.049.E-03 | 6.418.E-05 | 2.524.E-01 | 1.221.E-01 | 9.736.E-04 | 8.363.E-02            | 3.829.E-05  |
| TAP             | kg SO <sub>2</sub> eq    | 1.062.E+00 | 5.251.E-01 | 2.181.E-02     | 3.920.E-03         | 4.448.E-03 | 1.706.E-04 | 3.279.E-01 | 1.105.E-01 | 8.815.E-04 | 6.770.E-02            | 4.528.E-05  |
| FEP             | kg P eq                  | 1.636.E-01 | 6.392.E-02 | 1.278.E-03     | 1.593.E-04         | 3.273.E-04 | 1.184.E-05 | 2.592.E-02 | 3.543.E-02 | 2.826.E-04 | 3.592.E-02            | 3.457.E-04  |
| MEP             | kg N eq                  | 1.666.E-01 | 1.590.E-01 | 9.636.E-05     | 9.832.E-06         | 3.281.E-05 | 9.187.E-07 | 1.301.E-03 | 2.404.E-03 | 1.917.E-05 | 3.619.E-03            | 1.233.E-04  |
| TETP            | kg 1,4-DCB               | 1.300.E+03 | 6.076.E+02 | 3.575.E+01     | 2.665.E+00         | 6.251.E+00 | 3.906.E-01 | 4.452.E+02 | 1.490.E+02 | 1.188.E+00 | 5.186.E+01            | 6.587.E-02  |
| FETP            | kg 1,4-DCB               | 1.488.E+01 | 6.690.E+00 | 3.351.E-01     | 3.031.E-02         | 4.946.E-02 | 3.841.E-03 | 3.825.E+00 | 3.382.E+00 | 2.697.E-02 | 5.312.E-01            | 2.127.E-03  |
| METP            | kg 1,4-DCB               | 1.935.E+01 | 8.624.E+00 | 4.406.E-01     | 3.972.E-02         | 6.705.E-02 | 5.026.E-03 | 5.066.E+00 | 4.348.E+00 | 3.468.E-02 | 7.195.E-01            | 2.893.E-03  |
| HTPc            | kg 1,4-DCB               | 1.741.E+01 | 9.358.E+00 | 2.340.E-01     | 3.141.E-02         | 5.456.E-02 | 2.945.E-03 | 3.617.E+00 | 2.804.E+00 | 2.236.E-02 | 1.280.E+00            | 2.681.E-03  |
| HTPnc           | kg 1,4-DCB               | 3.043.E+02 | 1.375.E+02 | 6.570.E+00     | 5.766.E-01         | 1.096.E+00 | 7.608.E-02 | 7.960.E+01 | 6.495.E+01 | 5.180.E-01 | 1.330.E+01            | 1.198.E-01  |
| LOP             | m2a crop eq              | 5.824.E+00 | 3.589.E+00 | 6.437.E-02     | 1.195.E-02         | 1.996.E-02 | 6.551.E-04 | 9.064.E-01 | 8.952.E-01 | 7.140.E-03 | 3.296.E-01            | 3.130.E-04  |
| SOP             | kg Cu eq                 | 3.018.E+00 | 5.478.E-01 | 2.240.E-02     | 2.602.E-03         | 2.002.E+00 | 3.163.E-04 | 2.807.E-01 | 1.008.E-01 | 8.039.E-04 | 6.057.E-02            | 1.194.E-04  |
| FFP             | kg oil eq                | 1.686.E+02 | 8.678.E+01 | 2.253.E+00     | 1.429.E-01         | 4.941.E-01 | 6.218.E-03 | 5.973.E+01 | 1.300.E+01 | 1.037.E-01 | 6.061.E+00            | 3.151.E-03  |
| WCP             | m <sup>3</sup>           | 3.876.E+00 | 2.643.E+00 | 7.184.E-02     | 6.150.E-02         | 8.216.E-03 | 5.254.E-02 | 6.560.E-01 | 2.538.E-01 | 2.024.E-03 | 2.304.E-01            | -1.033.E-01 |

Table S10. Life cycle impact assessment results for 1kg of R5 method

| Impact category | Unit                     | Total      | D.I water  | Whitlockite | HNO <sub>3</sub> | KI         | Sonication | Stirring   | Filtration | Washing    | Drying     | Wastewater |
|-----------------|--------------------------|------------|------------|-------------|------------------|------------|------------|------------|------------|------------|------------|------------|
| GWP             | kg CO <sub>2</sub> eq    | 2.804.E+02 | 6.897.E-01 | 6.442.E-03  | 1.906.E+02       | 2.026.E+00 | 9.314.E-02 | 6.040.E-01 | 2.684.E-02 | 6.711.E-02 | 8.583.E+01 | 5.619.E-02 |
| ODP             | kg CFC <sup>-11</sup> eq | 3.897.E-03 | 6.243.E-07 | 1.635.E-09  | 3.870.E-03       | 4.797.E-07 | 8.430.E-08 | 1.737.E-07 | 7.719.E-09 | 1.930.E-08 | 2.468.E-05 | 1.616.E-08 |
| IRP             | kBq Co-60 eq             | 2.425.E+01 | 4.568.E-02 | 2.147.E-04  | 1.021.E+00       | 6.962.E-02 | 6.169.E-03 | 1.611.E-01 | 7.159.E-03 | 1.790.E-02 | 2.289.E+01 | 1.498.E-02 |
| HOFP            | kg NO <sub>x</sub> eq    | 3.814.E-01 | 1.626.E-03 | 5.065.E-06  | 1.653.E-01       | 3.497.E-03 | 2.196.E-04 | 1.463.E-03 | 6.502.E-05 | 1.626.E-04 | 2.079.E-01 | 1.361.E-04 |
| PMFP            | kg PM2.5 eq              | 2.459.E-01 | 1.785.E-03 | 3.493.E-06  | 1.282.E-01       | 2.207.E-03 | 2.410.E-04 | 7.864.E-04 | 3.495.E-05 | 8.738.E-05 | 1.117.E-01 | 7.316.E-05 |
| EOFP            | kg NO <sub>x</sub> eq    | 3.928.E-01 | 1.678.E-03 | 5.211.E-06  | 1.718.E-01       | 3.688.E-03 | 2.266.E-04 | 1.495.E-03 | 6.645.E-05 | 1.661.E-04 | 2.125.E-01 | 1.391.E-04 |
| TAP             | kg SO <sub>2</sub> eq    | 8.187.E-01 | 4.461.E-03 | 8.641.E-06  | 6.130.E-01       | 5.255.E-03 | 6.025.E-04 | 1.354.E-03 | 6.017.E-05 | 1.504.E-04 | 1.924.E-01 | 1.259.E-04 |
| FEP             | kg P eq                  | 9.733.E-02 | 3.095.E-04 | 1.949.E-06  | 2.410.E-02       | 4.018.E-04 | 4.180.E-05 | 4.340.E-04 | 1.929.E-05 | 4.822.E-05 | 6.167.E-02 | 4.037.E-05 |
| MEP             | kg N eq                  | 9.403.E-03 | 2.403.E-05 | 1.524.E-07  | 1.457.E-03       | 3.751.E-05 | 3.245.E-06 | 2.945.E-05 | 1.309.E-06 | 3.272.E-06 | 4.184.E-03 | 2.740.E-06 |
| TETP            | kg 1,4-DCB               | 6.546.E+02 | 1.021.E+01 | 1.151.E-02  | 3.719.E+02       | 7.579.E+00 | 1.379.E+00 | 1.825.E+00 | 8.111.E-02 | 2.028.E-01 | 2.593.E+02 | 1.698.E-01 |
| FETP            | kg 1,4-DCB               | 1.050.E+01 | 1.005.E-01 | 1.467.E-04  | 4.328.E+00       | 6.242.E-02 | 1.357.E-02 | 4.142.E-02 | 1.841.E-03 | 4.602.E-03 | 5.886.E+00 | 3.853.E-03 |
| METP            | kg 1,4-DCB               | 1.362.E+01 | 1.314.E-01 | 1.940.E-04  | 5.671.E+00       | 8.415.E-02 | 1.775.E-02 | 5.325.E-02 | 2.367.E-03 | 5.917.E-03 | 7.567.E+00 | 4.954.E-03 |
| HTPc            | kg 1,4-DCB               | 9.814.E+00 | 7.701.E-02 | 3.123.E-04  | 4.654.E+00       | 6.995.E-02 | 1.040.E-02 | 3.434.E-02 | 1.526.E-03 | 3.816.E-03 | 4.880.E+00 | 3.195.E-03 |
| HTPnc           | kg 1,4-DCB               | 2.030.E+02 | 1.990.E+00 | 3.153.E-03  | 8.182.E+01       | 1.351.E+00 | 2.687.E-01 | 7.956.E-01 | 3.536.E-02 | 8.840.E-02 | 1.130.E+02 | 7.401.E-02 |
| LOP             | m2a crop eq              | 3.474.E+00 | 1.713.E-02 | 9.617.E-05  | 1.846.E+00       | 2.795.E-02 | 2.314.E-03 | 1.096.E-02 | 4.873.E-04 | 1.218.E-03 | 1.558.E+00 | 1.020.E-03 |
| SOP             | kg Cu eq                 | 2.572.E+00 | 8.273.E-03 | 1.675.E-05  | 3.737.E-01       | 2.009.E+00 | 1.117.E-03 | 1.235.E-03 | 5.487.E-05 | 1.372.E-04 | 1.754.E-01 | 1.149.E-04 |
| FFP             | kg oil eq                | 4.599.E+01 | 1.626.E-01 | 4.330.E-04  | 2.234.E+01       | 5.559.E-01 | 2.196.E-02 | 1.592.E-01 | 7.075.E-03 | 1.769.E-02 | 2.262.E+01 | 1.481.E-02 |
| WCP             | m <sup>3</sup>           | 4.097.E-01 | 1.374.E+00 | 3.897.E-05  | 1.465.E+00       | 8.452.E-03 | 1.856.E-01 | 3.109.E-03 | 1.382.E-04 | 3.454.E-04 | 4.418.E-01 | 2.892.E-04 |

Table S11. Life cycle impact assessment result for 1kg of solvent.

| Impact category | Unit                     | DMF      | EA       | D.I water | IPA      |
|-----------------|--------------------------|----------|----------|-----------|----------|
| GWP             | kg CO <sub>2</sub> eq    | 3.977056 | 3.611415 | 0.000484  | 2.374733 |
| ODP             | kg CFC-11 eq             | 8.70E-07 | 8.99E-07 | 4.38E-10  | 2.73E-07 |
| IRP             | kBq Co-60 eq             | 0.15297  | 0.145592 | 3.21E-05  | 0.029841 |
| HOFP            | kg NO <sub>x</sub> eq    | 0.008349 | 0.009095 | 1.14E-06  | 0.004801 |
| PMFP            | kg PM2.5 eq              | 0.005422 | 0.005206 | 1.25E-06  | 0.002671 |
| EOFP            | kg NO <sub>x</sub> eq    | 0.009021 | 0.009945 | 1.18E-06  | 0.005445 |
| TAP             | kg SO <sub>2</sub> eq    | 0.011276 | 0.012391 | 3.13E-06  | 0.007361 |
| FEP             | kg P eq                  | 0.001282 | 0.001599 | 2.17E-07  | 0.000598 |
| MEP             | kg N eq                  | 0.003084 | 9.33E-05 | 1.69E-08  | 2.87E-05 |
| TETP            | kg 1,4-DCB               | 11.38575 | 11.25815 | 0.007173  | 9.801656 |
| FETP            | kg 1,4-DCB               | 0.130121 | 0.136616 | 7.05E-05  | 0.08794  |
| METP            | kg 1,4-DCB               | 0.167746 | 0.179351 | 9.23E-05  | 0.116215 |
| HTPc            | kg 1,4-DCB               | 0.184845 | 0.189567 | 5.41E-05  | 0.080192 |
| HTPnc           | kg 1,4-DCB               | 2.749669 | 3.067043 | 0.001397  | 1.822147 |
| LOP             | m <sup>2</sup> a crop eq | 0.071067 | 0.08174  | 1.20E-05  | 0.018583 |
| SOP             | kg Cu eq                 | 0.010354 | 0.01075  | 5.81E-06  | 0.006363 |
| FFP             | kg oil eq                | 1.718571 | 1.668445 | 0.000114  | 1.376752 |
| WCP             | m <sup>3</sup>           | 0.04984  | 0.043128 | 0.000965  | 0.015134 |



Figure S2. Life cycle impact assessment results of  $PbI_2$  Recycling methods versus the number of dissolution solvent reuses between the 100 reuses and 150 reuses (a) Human carcinogenic Toxicity

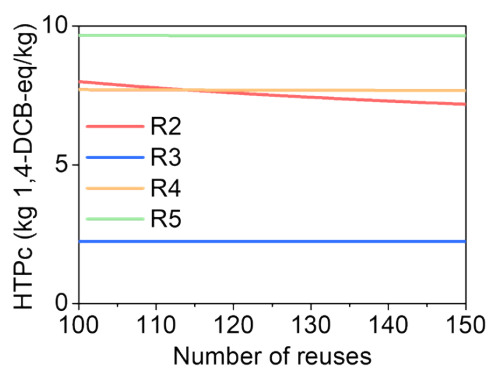

Figure S3. Life cycle impact assessment results of Lead Recycling methods(R1~R5) versus the number of dissolution solvent reuses (a) Human non-carcinogenic Toxicity

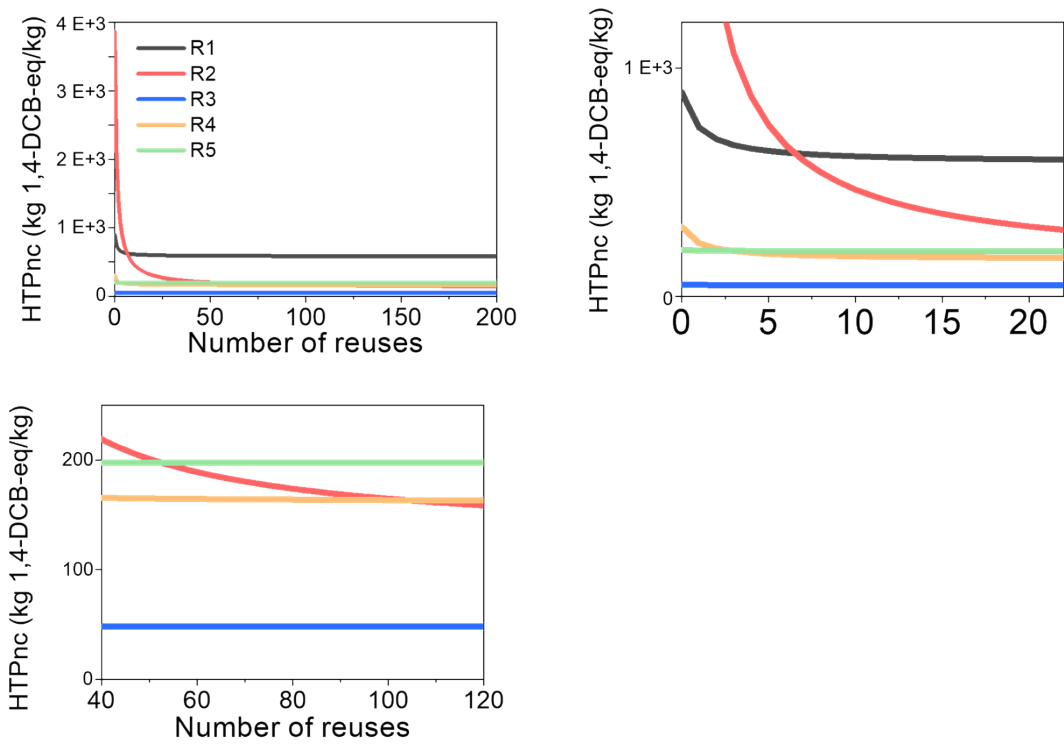

Table S12. Table of the reduction rate of life cycle impact assessment result according to the number of dissolution solvent reuses in GWP

| GWP<br>Number of<br>reuses | Reduction rate (%) |       |      |       |      |
|----------------------------|--------------------|-------|------|-------|------|
|                            | R1                 | R2    | R3   | R4    | R5   |
| 1                          | 23.89              | 49.25 | 0.96 | 23.68 | 0.21 |
| 10                         | 43.44              | 89.55 | 1.74 | 43.05 | 0.39 |
| 20                         | 45.50              | 93.81 | 1.82 | 45.10 | 0.40 |
| 30                         | 46.24              | 95.33 | 1.85 | 45.83 | 0.41 |
| 40                         | 46.61              | 96.10 | 1.87 | 46.20 | 0.41 |
| 50                         | 46.84              | 96.57 | 1.88 | 46.43 | 0.42 |
| 60                         | 47.00              | 96.89 | 1.88 | 46.58 | 0.42 |
| 70                         | 47.11              | 97.12 | 1.89 | 46.69 | 0.42 |
| 80                         | 47.19              | 97.29 | 1.89 | 46.77 | 0.42 |
| 90                         | 47.25              | 97.42 | 1.89 | 46.83 | 0.42 |
| 100                        | 47.31              | 97.53 | 1.89 | 46.89 | 0.42 |
| 150                        | 47.46              | 97.85 | 1.90 | 47.04 | 0.42 |
| 200                        | 47.54              | 98.02 | 1.90 | 47.12 | 0.42 |



Table S13. Table of the reduction rate of life cycle impact assessment result according to the number of dissolution solvent reuses in HTPc

| HTPc<br>Number of<br>reuses | Reduction rate (%) |       |      |       |      |
|-----------------------------|--------------------|-------|------|-------|------|
|                             | R1                 | R2    | R3   | R4    | R5   |
| 1                           | 22.53              | 48.91 | 2.10 | 28.15 | 0.80 |
| 10                          | 40.96              | 88.93 | 3.82 | 51.18 | 1.46 |
| 20                          | 42.91              | 93.17 | 4.00 | 53.62 | 1.53 |
| 30                          | 43.60              | 94.67 | 4.06 | 54.48 | 1.55 |
| 40                          | 43.96              | 95.44 | 4.10 | 54.93 | 1.57 |
| 50                          | 44.17              | 95.91 | 4.12 | 55.19 | 1.57 |
| 60                          | 44.32              | 96.22 | 4.13 | 55.38 | 1.58 |
| 70                          | 44.42              | 96.45 | 4.14 | 55.51 | 1.58 |
| 80                          | 44.50              | 96.62 | 4.15 | 55.60 | 1.59 |
| 90                          | 44.56              | 96.75 | 4.15 | 55.68 | 1.59 |
| 100                         | 44.61              | 96.86 | 4.16 | 55.74 | 1.59 |
| 150                         | 44.76              | 97.18 | 4.17 | 55.93 | 1.59 |
| 200                         | 44.83              | 97.34 | 4.18 | 56.02 | 1.60 |

Table S14. Table of the reduction rate of life cycle impact assessment result according to the number of dissolution solvent reuses in HTPnc

| HTPnc<br>Number of<br>reuses | Reduction rate (%) |       |      |       |      |
|------------------------------|--------------------|-------|------|-------|------|
|                              | R1                 | R2    | R3   | R4    | R5   |
| 1                            | 17.26              | 48.35 | 3.32 | 23.34 | 0.22 |
| 10                           | 31.38              | 87.91 | 6.04 | 42.44 | 1.32 |
| 20                           | 32.88              | 92.09 | 6.32 | 44.46 | 1.43 |
| 30                           | 33.41              | 93.58 | 6.43 | 45.18 | 1.48 |
| 40                           | 33.68              | 94.34 | 6.48 | 45.54 | 1.50 |
| 50                           | 33.84              | 94.80 | 6.51 | 45.77 | 1.51 |
| 60                           | 33.95              | 95.11 | 6.53 | 45.92 | 1.52 |
| 70                           | 34.03              | 95.34 | 6.55 | 46.02 | 1.52 |
| 80                           | 34.09              | 95.50 | 6.56 | 46.11 | 1.53 |
| 90                           | 34.14              | 95.64 | 6.57 | 46.17 | 1.53 |
| 100                          | 34.18              | 95.74 | 6.58 | 46.22 | 1.54 |
| 150                          | 34.29              | 96.06 | 6.60 | 46.37 | 1.54 |
| 200                          | 34.35              | 96.22 | 6.61 | 46.45 | 1.55 |

Table S15. The weight of recycled  $PbI_2$  and volume of dissolution solvent for lead recycling process in previous researchers. The  $PbI_2$  solubility is 368.8g per litter in DMF and 0.76g per litter in water. <sup>6, 7</sup>

|    |                | Recycled $PbI_2$ (g) | Lead dissolution solvent | Volume (ml) | Dissolved $PbI_2$ ratio based on solubility at room temperature |
|----|----------------|----------------------|--------------------------|-------------|-----------------------------------------------------------------|
| R1 | Zhang et al.   | 0.1685 g             | DMF                      | 20          | ~2.28 %                                                         |
| R2 | Binek et al.   | 0.0193 g             | DMF                      | 14          | ~0.37 %                                                         |
| R3 | Schmidt et al. | 1.05 g               | Water                    | 1000        | ~138 %                                                          |
| R4 | Chen et al.    | 0.1831 g             | DMF                      | 10          | ~4.96 %                                                         |
| R5 | Hong et al.    | 0.7 g                | Water                    | 1000        | ~92 %                                                           |

## References

1. S. Zhang, L. Shen, M. Huang, Y. Yu, L. Lei, J. Shao, Q. Zhao, Z. Wu, J. Wang and S. Yang, *ACS Sustainable Chemistry & Engineering*, 2018, **6**, 7558-7564.
2. A. Binek, M. L. Petrus, N. Huber, H. Bristow, Y. Hu, T. Bein and P. Docampo, *ACS Appl Mater Interfaces*, 2016, **8**, 12881-12886.
3. F. Schmidt, M. Amrein, S. Hedwig, M. Kober-Czerny, A. Paracchino, V. Holappa, R. Suhonen, A. Schaffer, E. C. Constable, H. J. Snaith and M. Lenz, *J Hazard Mater*, 2023, **447**, 130829.
4. B. Chen, C. Fei, S. Chen, H. Gu, X. Xiao and J. Huang, *Nat Commun*, 2021, **12**, 5859.
5. J. S. Hong, H. J. Kim, C. H. Sohn, O. Y. Gong, J. H. Choi, K. H. Cho, G. S. Han, K. T. Nam and H. S. Jung, *Energy & Environmental Materials*, 2022, **6**.
6. J. Zhang, T. Bu, J. Li, H. Li, Y. Mo, Z. Wu, Y. Liu, X.-L. Zhang, Y.-B. Cheng and F. Huang, *Journal of Materials Chemistry A*, 2020, **8**, 8447-8454.
7. W. M. Haynes, *CRC handbook of chemistry and physics*, CRC press, 2016.
